# Supplementary material for: A mechanogenetic role for the actomyosin complex in branching morphogenesis of epithelial organs
Source: Oxford University Press journal article supplement (doi:10.1242/dev.190785), 2021-03-03
Supplement: dev190785supp.pdf [file dev190785supp.pdf]

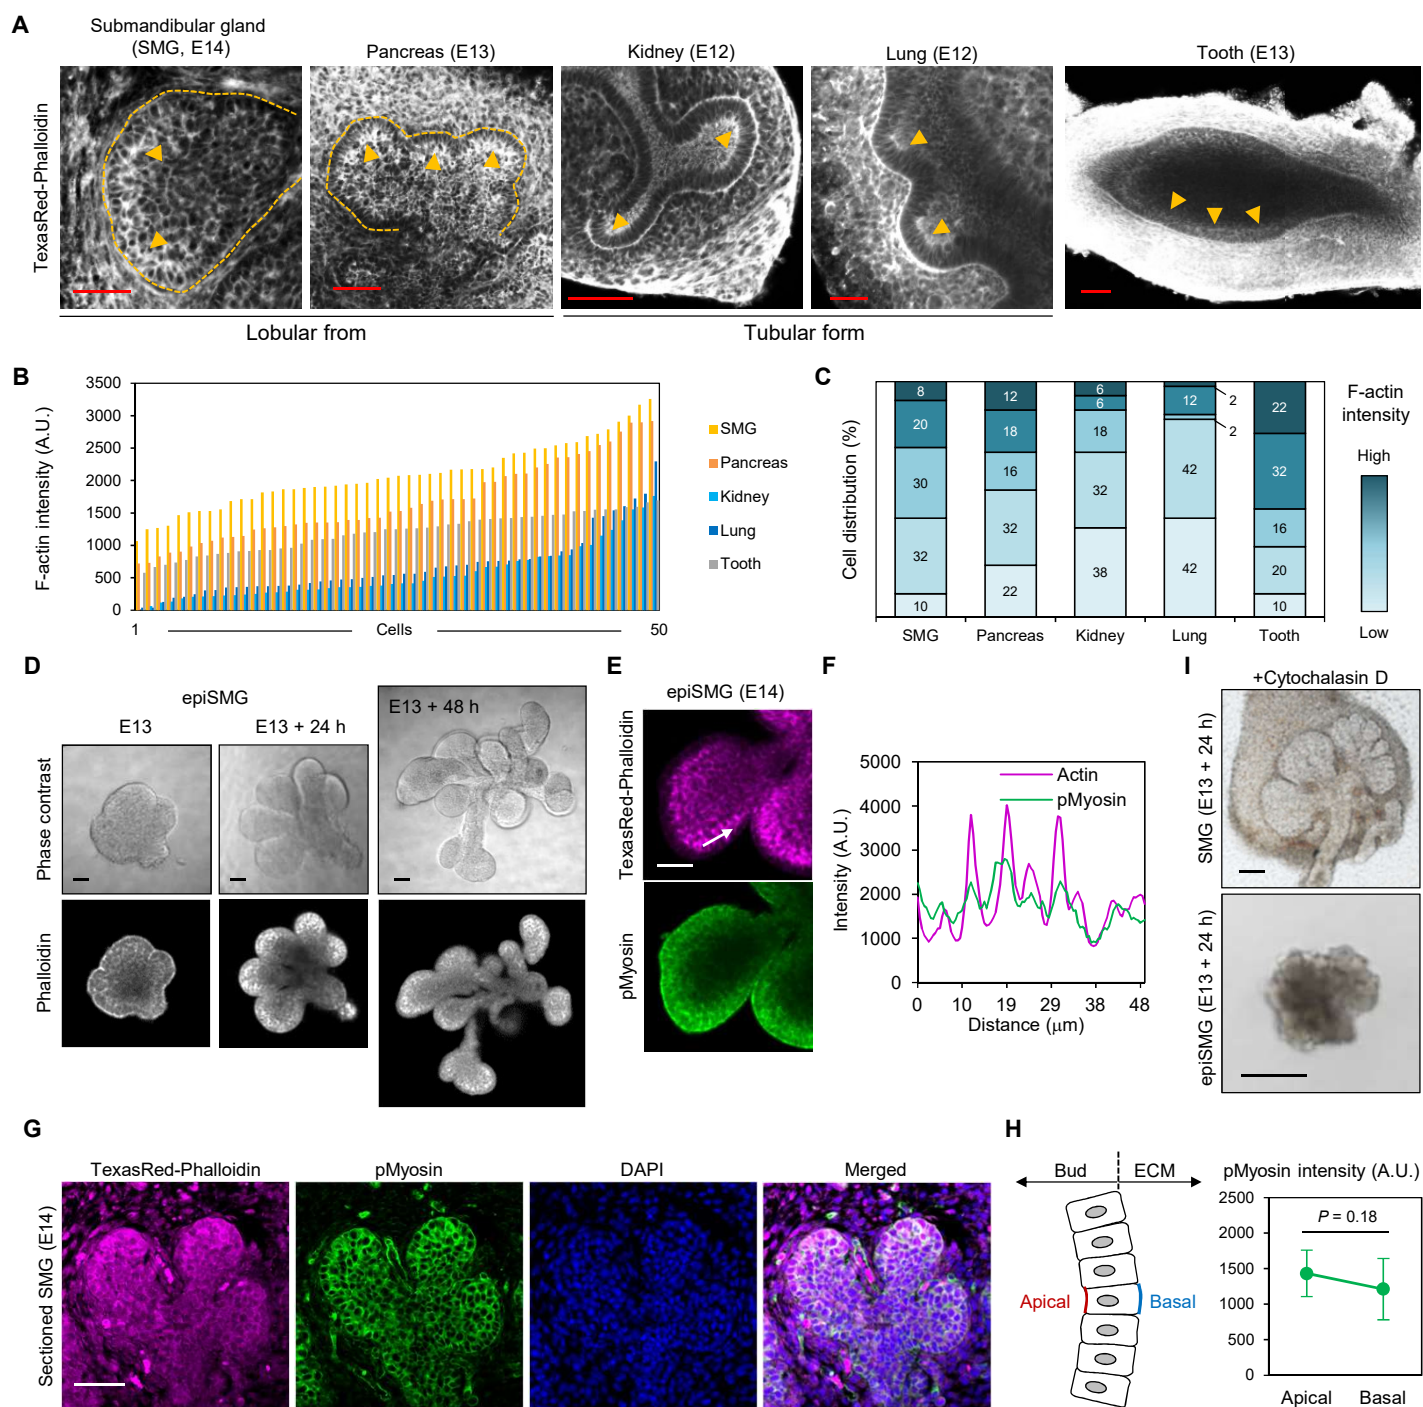

**Fig. S1. Characteristic F-actin patterns in diverse epithelial organs.** (A) F-actin (TexasRed-phalloidin) images of explant cultures of epithelial organs. Yellow dashed lines present the outline of epithelial buds. Yellow arrowheads present regions of high actin signals. (B) F-actin intensity of single cells of epithelial buds. (C) Percentage of epithelial cells in the different F-actin intensity.  $n = 50$  cells per group. (D) Phase contrast (upper) and TexasRed-phalloidin (lower) images of developing epiSMG cultures for 48 h. (E) TexasRed-phalloidin and immunolabelled phosphorylated myosin (pMyosin) images of epiSMG culture. The white arrow indicates the region used for the intensity plot (panel F). (F) Intensity plot of F-actin and phosphorylated myosin signals. (G) The images of TexasRed-phalloidin (magenta), pMyosin (green) and DAPI (blue) of sectioned SMG cultures (4  $\mu\text{m}$  thickness). (H) Intensity of pMyosin signals in apical and basal part of peripheral epithelial cells in panel G ( $n = 20$  cells). Paired t-test. Mean  $\pm$  STD. (I) Morphological changes in mouse embryonic SMG (upper) and epiSMG (lower) cultures upon 100 nM cytochalasin D. Scale bars: 50  $\mu\text{m}$ .

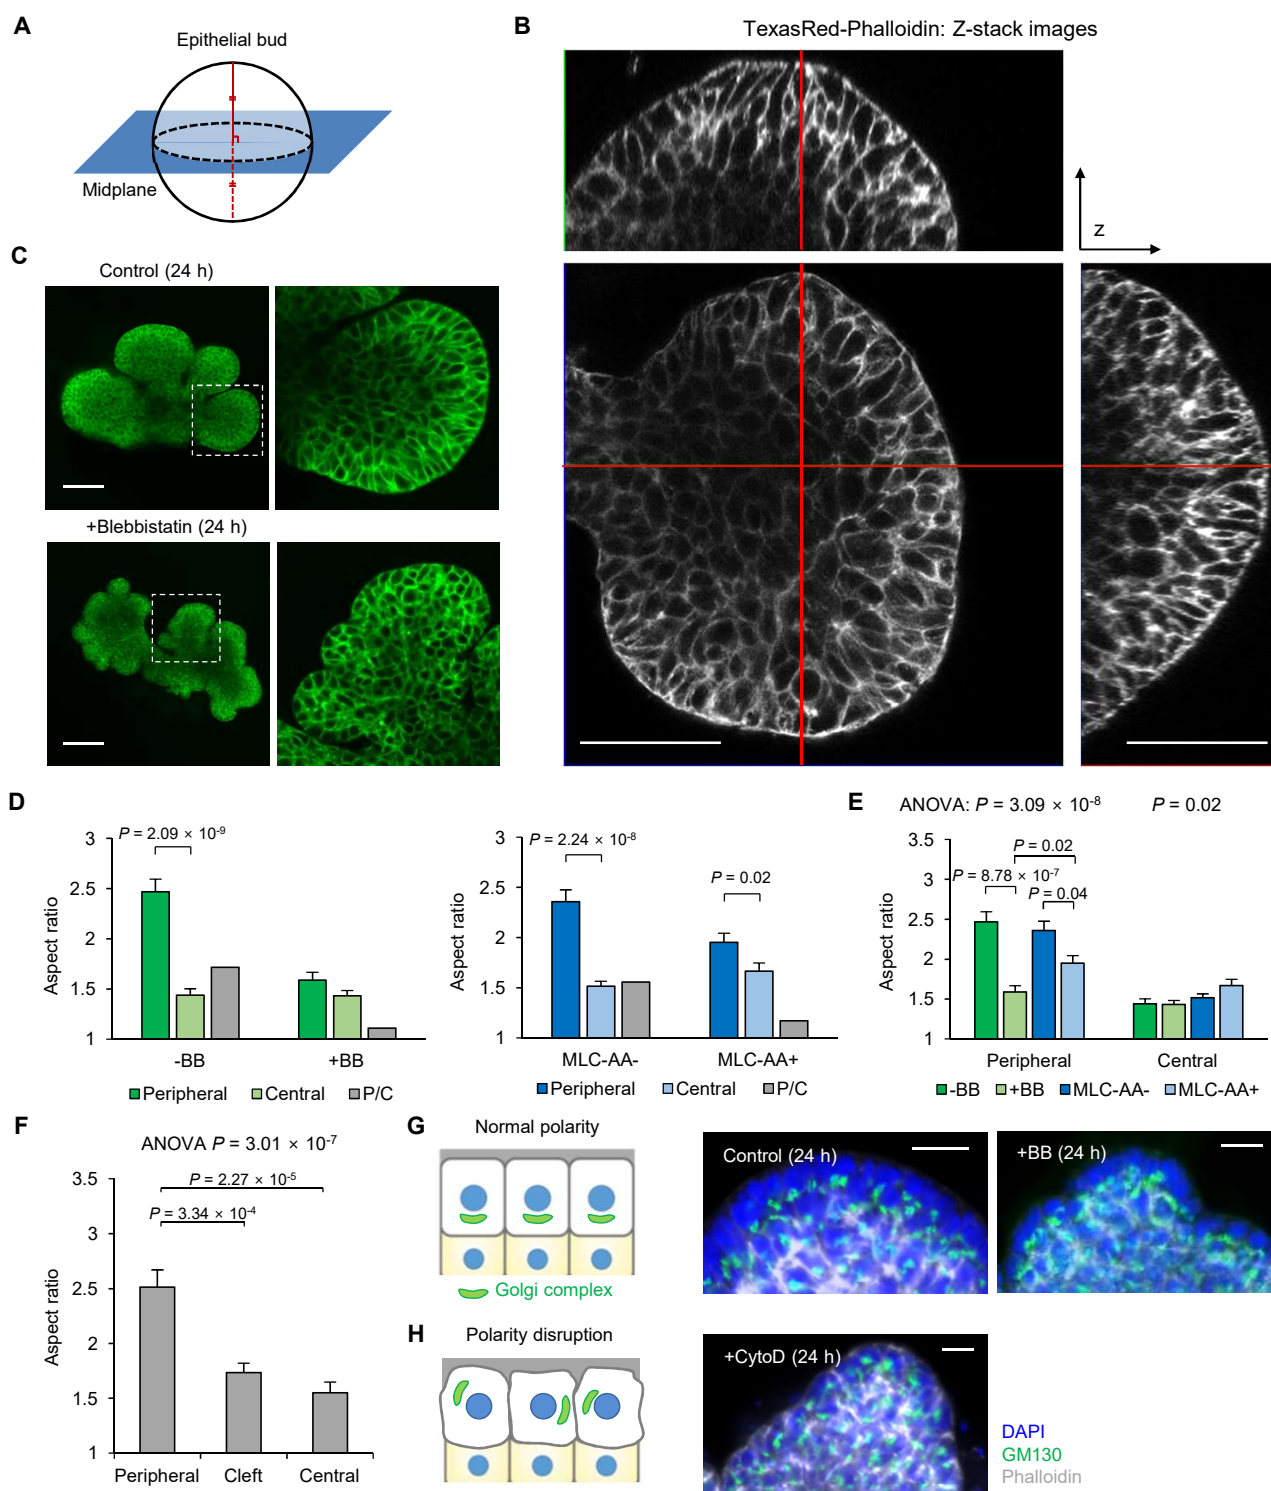

**Fig. S2. Changes in diverse cell parameters upon perturbation of actomyosin contractility** (A) Schematic representation of the optically sectioned imaging plane for single cell analysis. (B) Z-stack images of TexasRed-phalloidin in epiSMG culture (E13 + 24 h). 1  $\mu$ m section, z: 71.00  $\mu$ m. (C) Immunolabelled images of E-cadherin (green) in E13 eSMG culture (left) and blebbistatin-treated (right) cultures. White dashed regions indicate the enlarged area. (D and E) Aspect ratio of cells in peripheral (P) and central (C) region of epithelial buds. Mean  $\pm$  sem. n = 30 cells (-BB and +BB) and 34 cells (MLC-AA- and MLC-AA+). (F) Aspect ratio of cells in different regions of epithelial buds. Mean  $\pm$  sem. n = 20 cells per group. (G) Apically polarized location of the Golgi complex (immunolabelled by GM130) in control and blebbistatin-treated eSMG cultures (E13). (H) Disrupted polarization of the Golgi complex in eSMG cultures treated with low-concentration cytochalasin D. Scale bars: 50  $\mu$ m (B, C), 20  $\mu$ m (G, H)

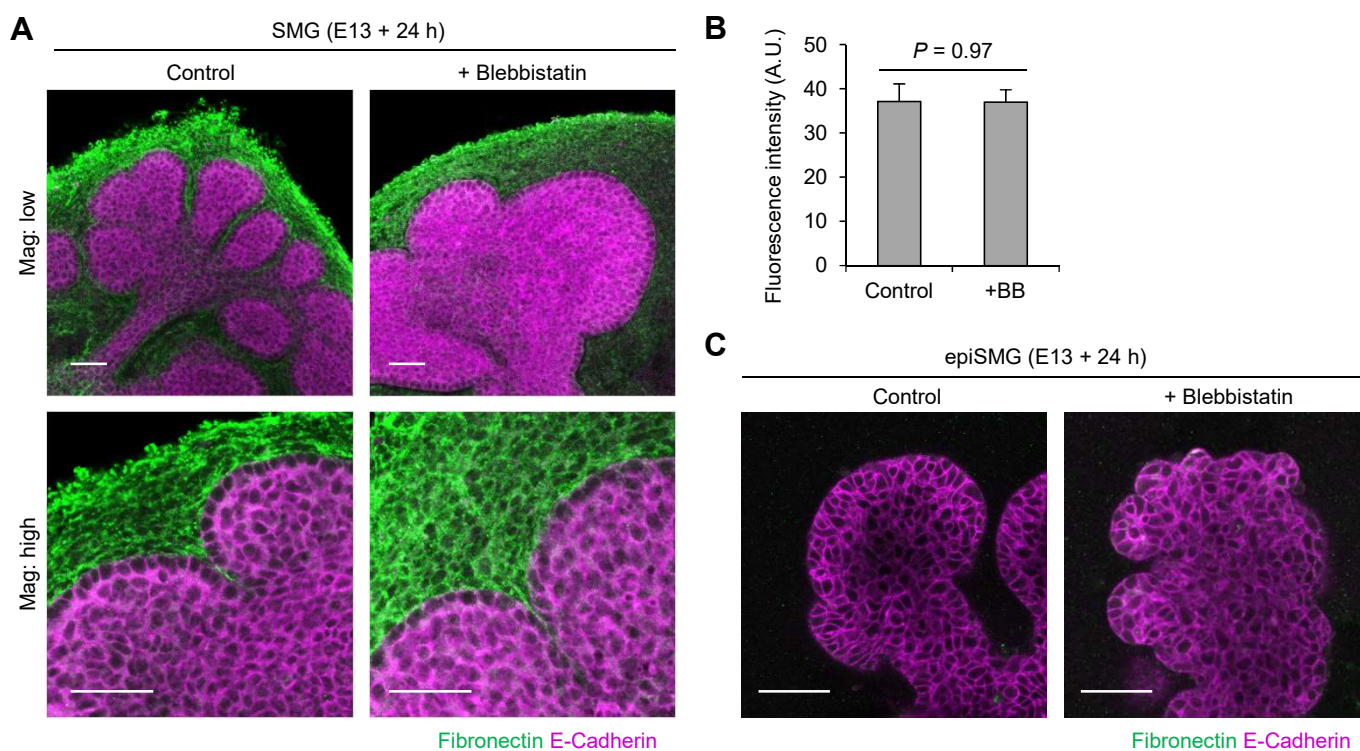

**Fig. S3. Fibronectin patterns of SMG upon blebbistatin treatment.** (A) Immunolabeled signals of fibronectin (green) and E-cadherin (magenta) of developing SMG cultures. (B) Quantified results of fluorescence signals of fibronectin of developing SMG cultures. Mean  $\pm$  sem.  $n = 12$  regions per group. (C) Immunolabeled signals of fibronectin (green) and E-cadherin (magenta) of developing epiSMG cultures. Scale bars: 50  $\mu$ m.



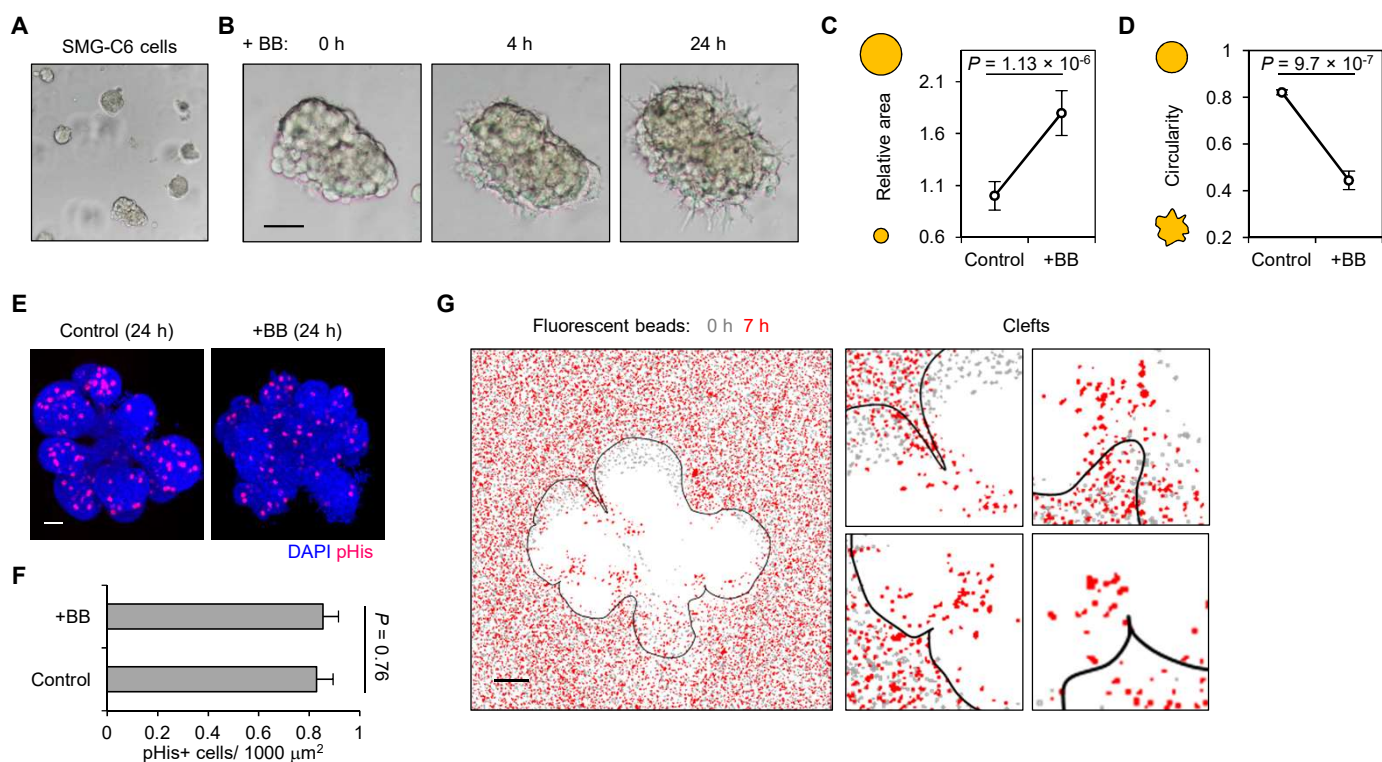

**Fig. S4. The mechanism of force transmission in branching morphogenesis** (A) Phase contrast image of salisphere culture using the SMG-C6 cell line (rat SMG acinar cell line). (B) Time-dependent morphological changes of salisphere cultures. (C and D) Quantified value of the relative area (C) and circularity (D) of salisphere cultures. Mean  $\pm$  sem.  $n = 12$  cultures per group. (E) Immunolabelled phosphorylated histone H3 signals (pHis, red) in developing eSMG cultures (E 13) without (Control) or with blebbistatin treatment (+BB). (F) Quantified pHis+ cell density (per 1,000  $\mu\text{m}^2$ ) in developing eSMG cultures (E 13). Mean  $\pm$  sem.  $n = 5$  cultures per group. (G) The location changes in fluorescent beads around developing epiSMG culture. Right subpanels show enlarged pericleft regions. Scale bars: 50  $\mu\text{m}$ .

**A**

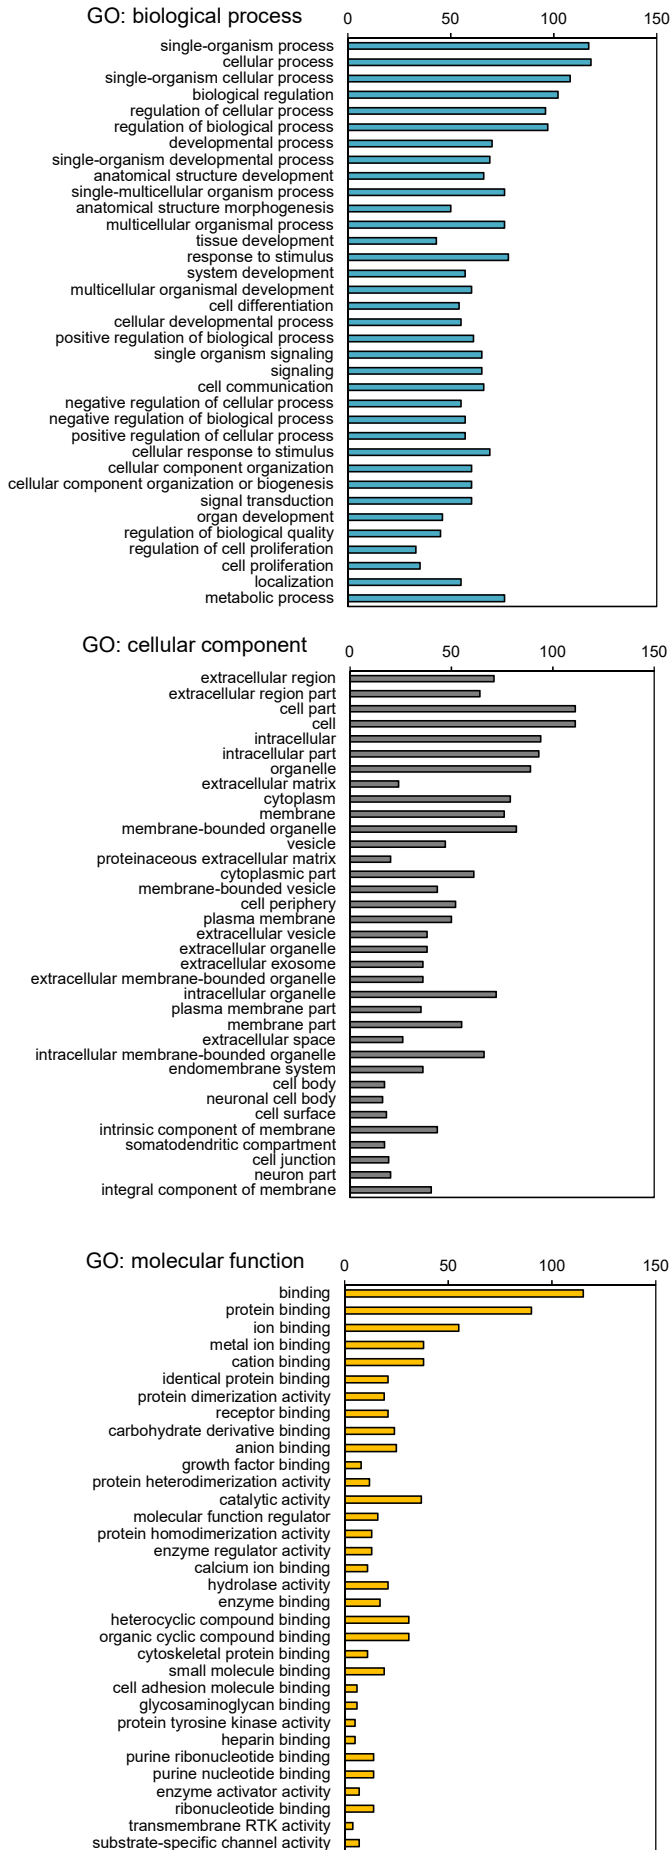

**B**

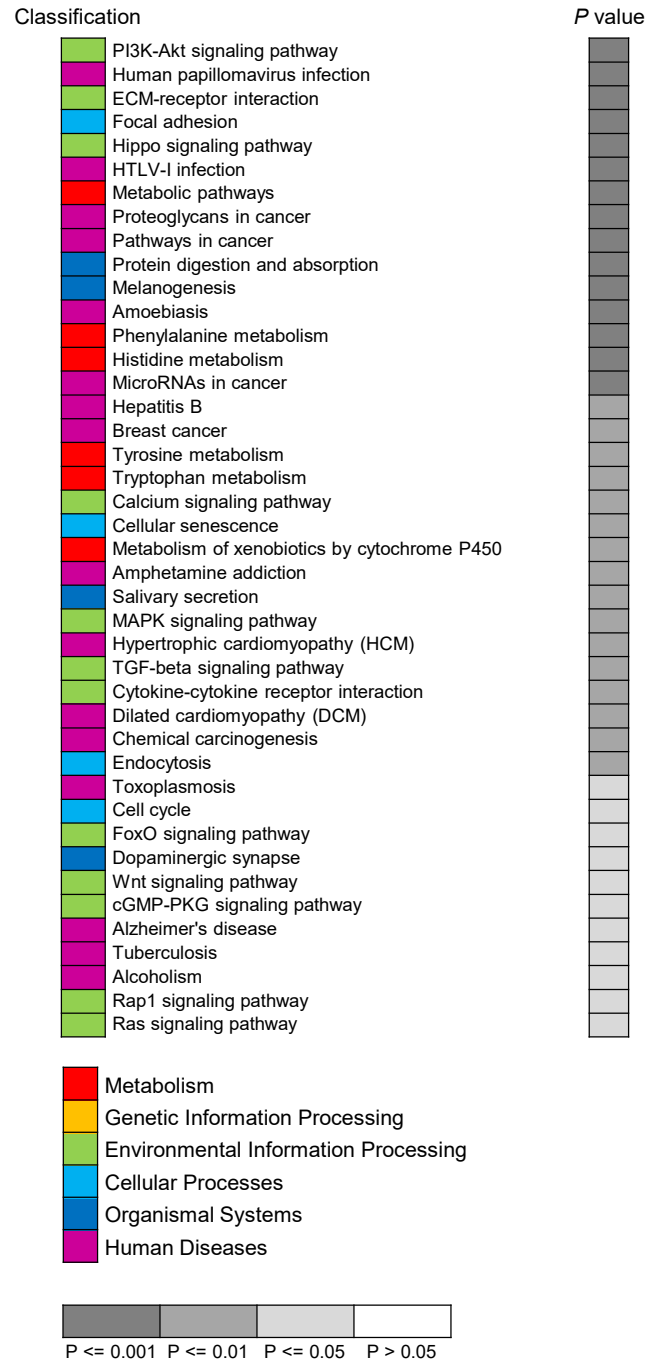

**Fig. S5. RNA-seq data analysis** (A) The top 35 gene ontology annotations with high significance (Control versus Blebbistatin,  $P < 0.005$ ). The horizontal axis indicates DEG count. (B) KEGG enrichment map score (based on  $P$  value). The lists are arranged by descending significance (ascending  $P$  values). The data can be accessed at NCBI GEO accession number GSE137928.

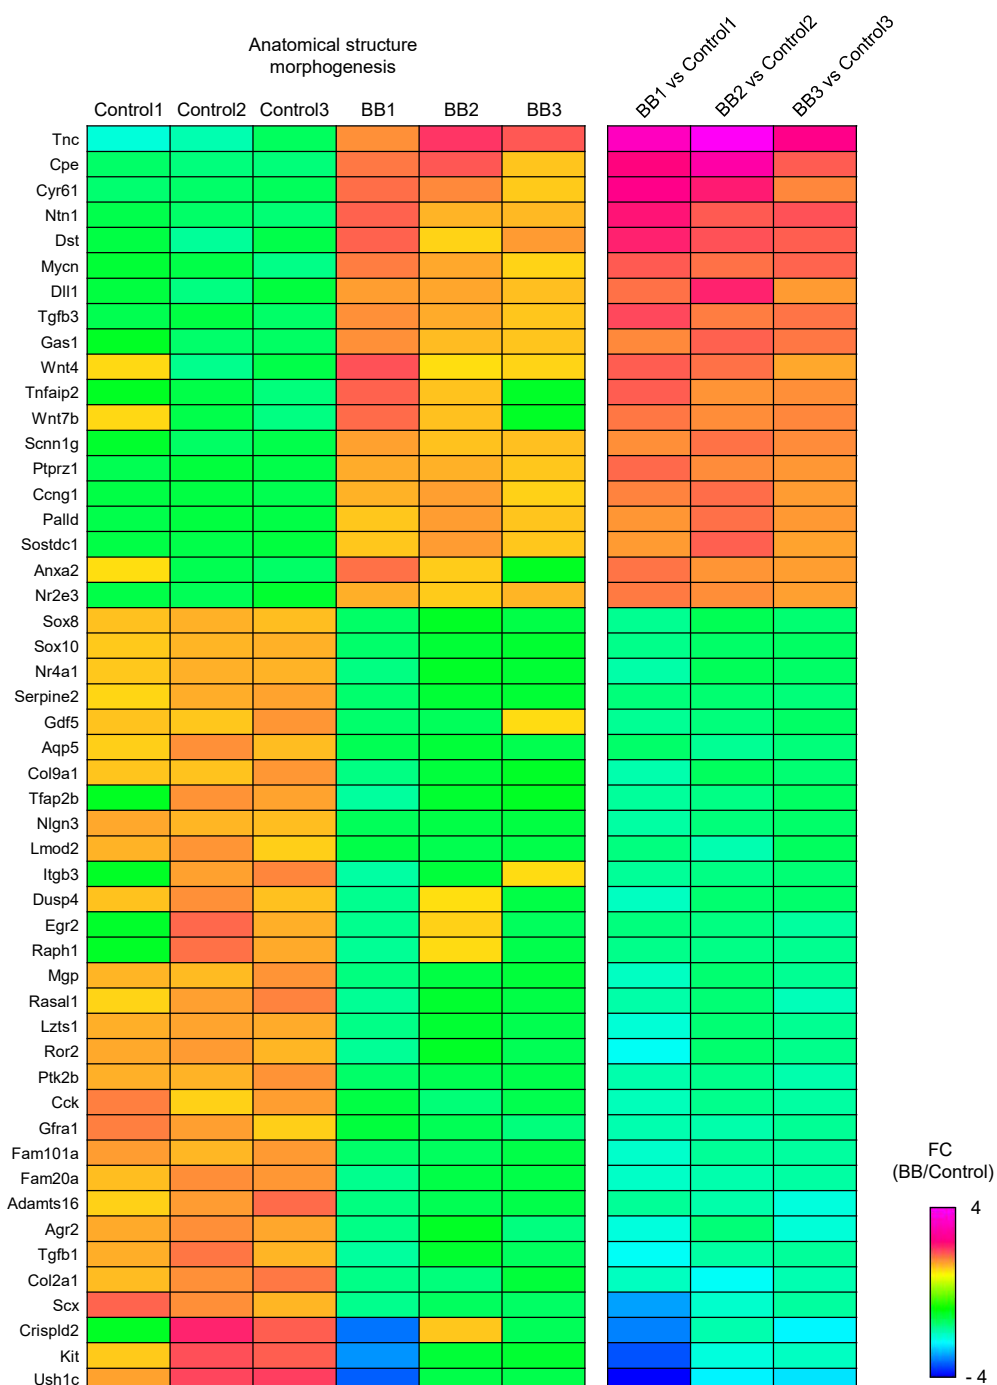

**Fig. S6.** Heatmap showing total DEGs in the anatomical structure morphogenesis annotation. DEGs are arranged by descending fold-change (FC).

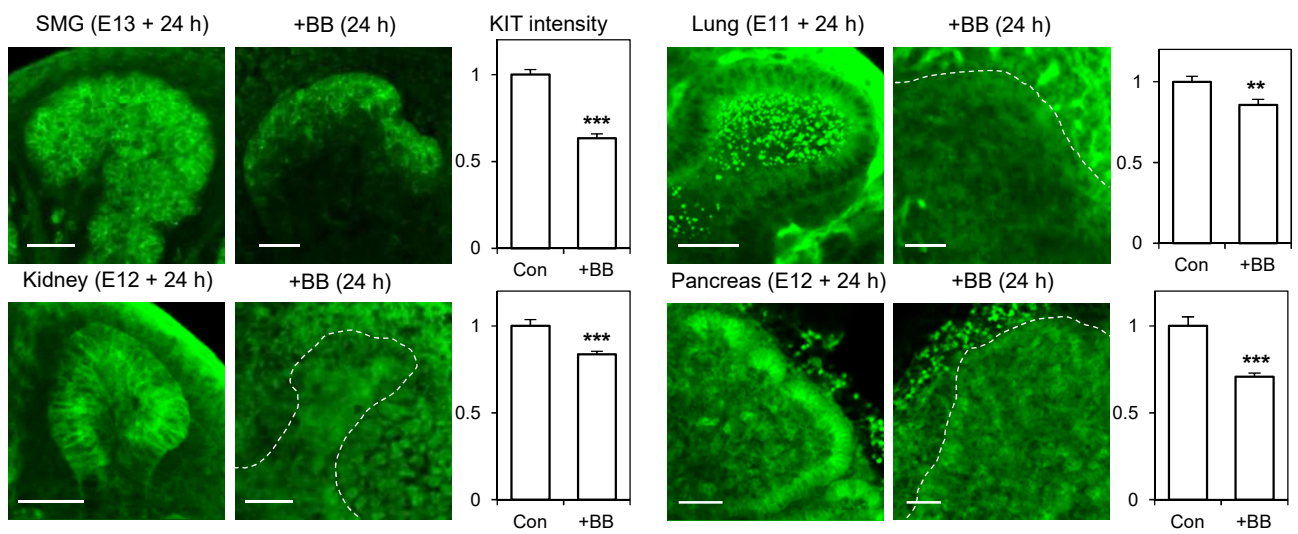

**Fig. S7. Immunolabelled images of KIT expression in epithelial organs (images) and quantified intensity of KIT signals (bar graphs).** Mean  $\pm$  sem.  $n = 15$  buds per group. White dashed regions represent the outline of epithelial region. \*,  $P < 0.05$ ; \*\*,  $P < 0.01$ ; \*\*\*,  $P < 0.001$ .



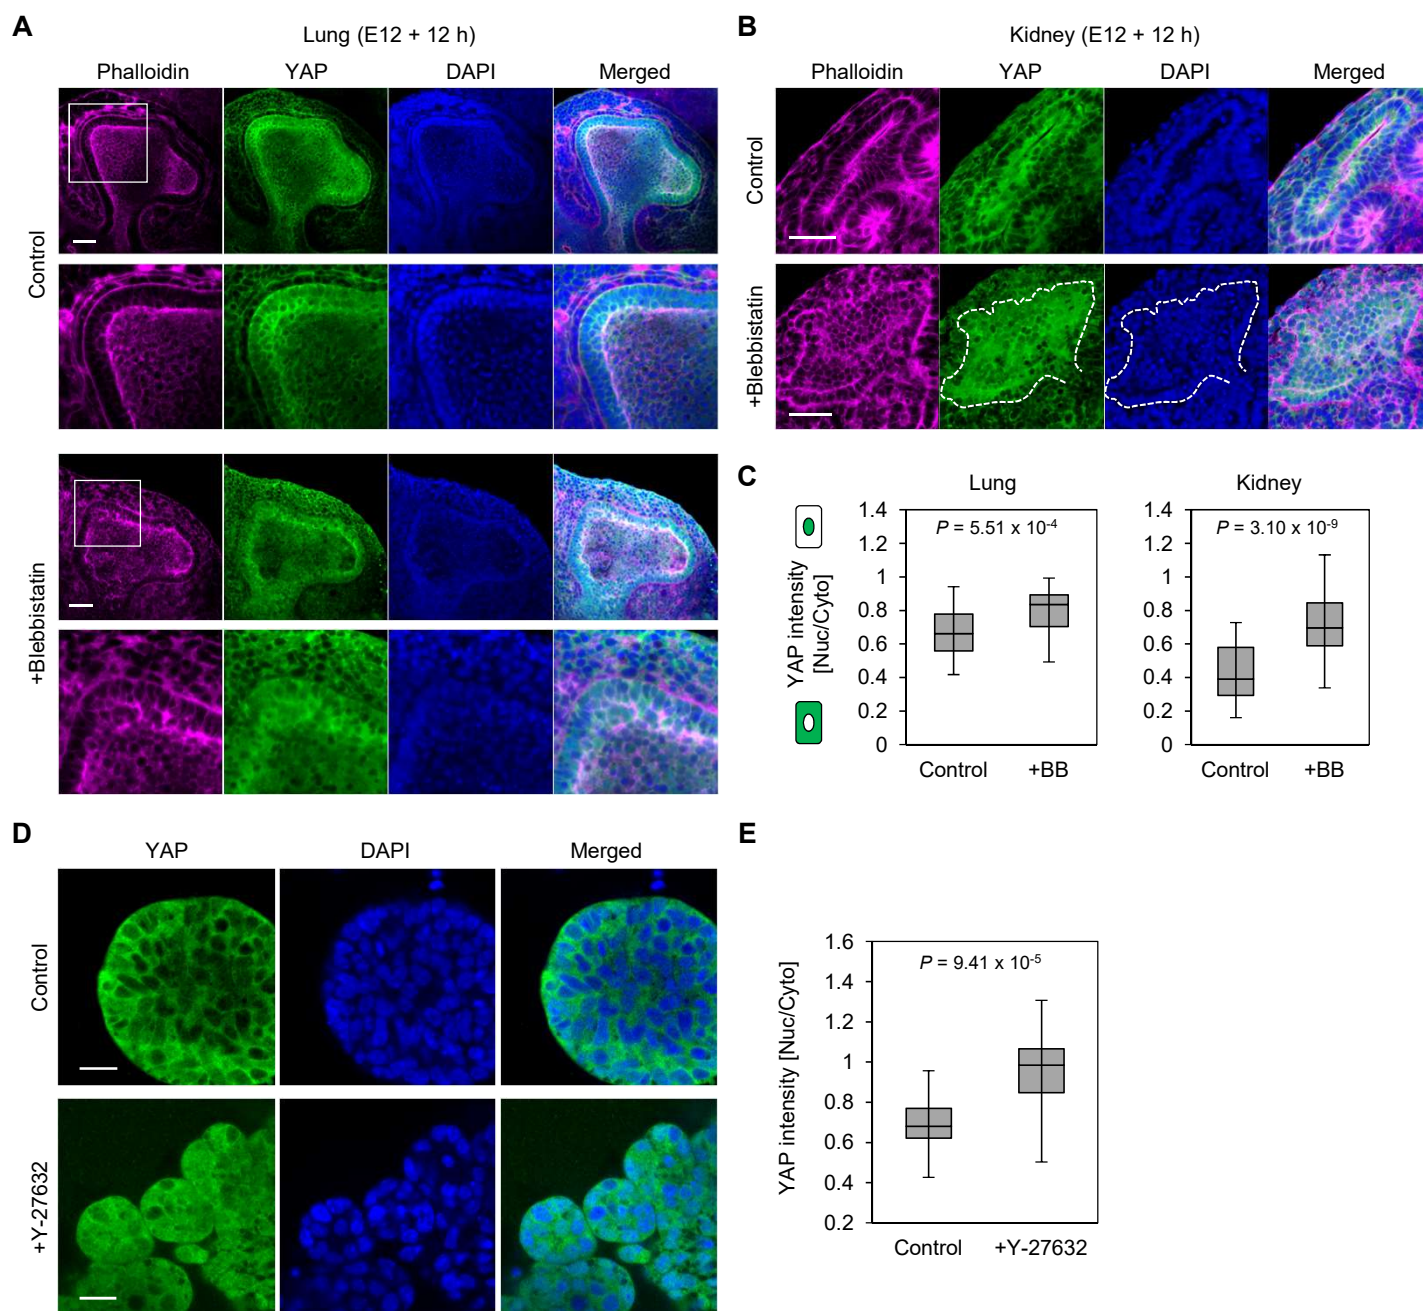

**Fig. S8. YAP localization changes upon the perturbation of actomyosin contractility.** (A and B) Immunolabelled images of phalloidin (magenta), YAP (green), DAPI (blue) in lung (A) and kidney (B) explant cultures in the control and blebbistatin-treated groups. (C) Relative intensity of nuclear and cytoplasmic YAP signals in control ( $n = 35$  cells) and blebbistatin ( $n = 35$  cells)-treated lung and kidney cultures. Median  $\pm$  max/min. (D) Immunolabelled images of YAP (green) patterns and DAPI (blue) signals in control and Y-27632-treated E13 SMG cultures (24 h). (E) Relative intensity of nuclear and cytoplasmic YAP signals in control ( $n = 20$  cells) and Y-27632 ( $n = 20$  cells)-treated SMG cultures. Median  $\pm$  max/min. Scale bars: 50  $\mu\text{m}$  (A, B), 20  $\mu\text{m}$  (D).

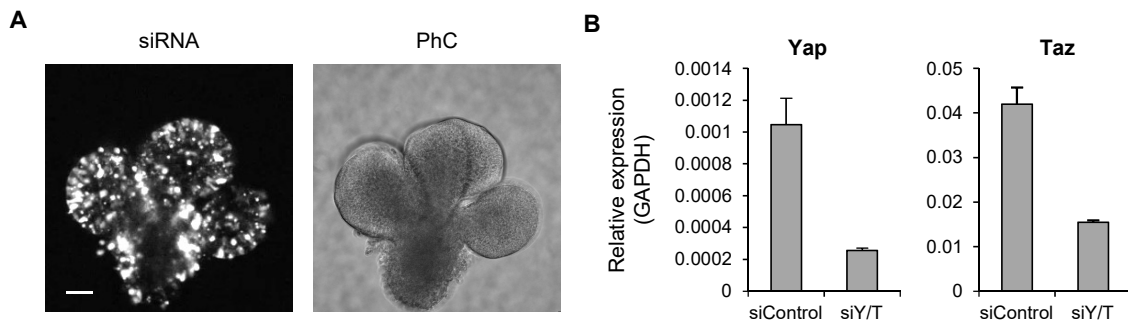

**Fig. S9. Regulation of YAP/TAZ expression in epiSMG cultures.** (A) The expression pattern of siRNA conjugated with fluorescent dye in E13 eSMG cultures. The transfected cultures were incubated for 24 h. PhC: phase contrast. (B) Nested qPCR results of the changes in Yap and Taz expression in eSMG cultures cotransfected with siYAP and siTAZ (siY/T). Mean  $\pm$  sem. n = 3. Scale bar: 50  $\mu$ m.

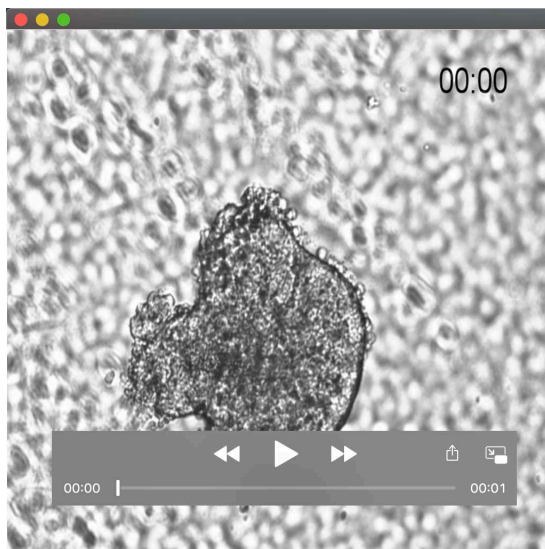

**Movie 1. Branching morphogenesis of eSMG culture.** Time-lapse phase contrast images of the initial branching process of eSMG cultures (E13). The images were acquired for 16 h with 10-min intervals.

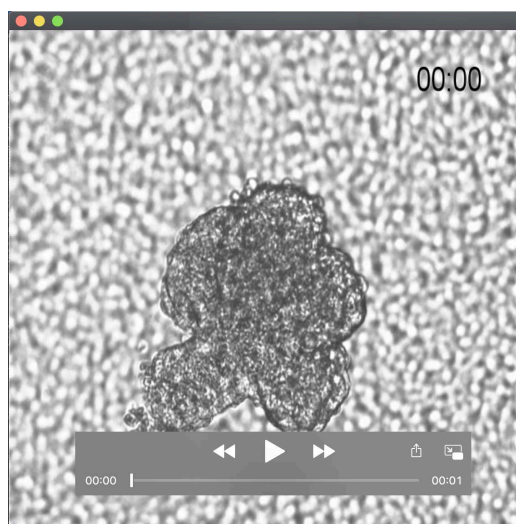

**Movie 2. Branching morphogenesis of eSMG culture treated with blebbistatin.** Time-lapse phase contrast images of the initial branching process of eSMG cultures (E13) treated with 50  $\mu$ M blebbistatin. The images were acquired for 16 h with 10-min intervals.

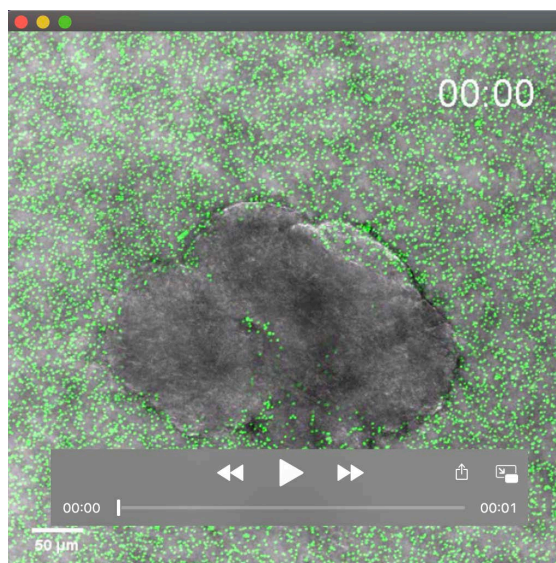

**Movie 3. 3-D traction force analysis (Control).** Time-lapse images of the initial branching process of eSMG cultures (E13). The isolated epithelial rudiments were embedded in Matrigel-DMEM/F-12 mixture containing 5% fluorescent microbeads (2.0  $\mu\text{m}$  diameter). The images were acquired for 7 h with 10-min intervals.

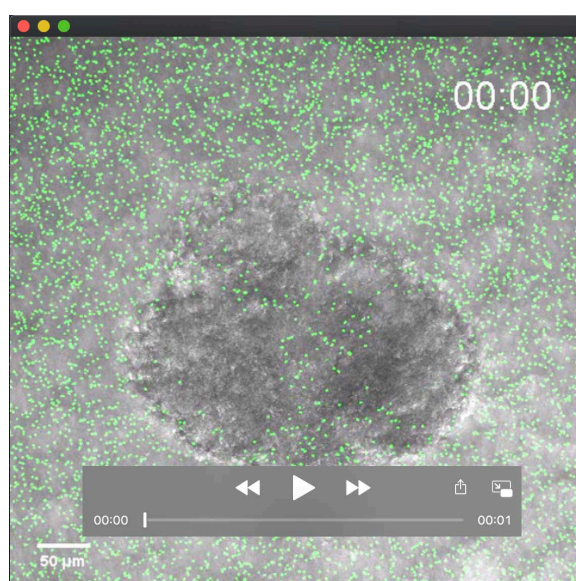

**Movie 4. 3-D traction force analysis (+Blebbistatin).** Time-lapse images of the initial branching process of eSMG cultures (E13) treated with 50  $\mu\text{M}$  blebbistatin. The isolated epithelial rudiments were embedded in Matrigel-DMEM/F-12 mixture containing 5% fluorescent microbeads (2.0  $\mu\text{m}$  diameter). The images were acquired for 7 h with 10-min intervals.

**Table S1.** Lists of all DEGs along with their FC values. Differentially expressed transcripts are satisfied with  $|\text{fold change}| \geq 1.5$  and independent t-test raw  $p < 0.05$ .

[Click here to Download Table S1](#)
